# Supplementary material for: Comparative analysis of Corynebacterium glutamicum genomes: a new perspective for the industrial production of amino acids
Source: PubMed Central journal article supplement (PMC5310272; doi:10.1186/s12864-016-3255-4), 2017-01-25
Supplement: 12864_2016_3255_MOESM2_ESM.pdf [file 12864_2016_3255_MOESM2_ESM.pdf]

TableS2 ANI

|                  | 01_NC_0<br>03450_AT<br>CC13032 | 02_NC_0<br>06958_AT<br>CC13032 | 03_NC_0<br>20519_K5<br>1 | 04_MB00<br>1 | 05_ATCC<br>21300 | 06_ATCC<br>13869 | 07_ATCC<br>13870 | 08_ATCC<br>14067 | 09_ATCC<br>21493 | 10_SYPS<br>062 | 11_SYPS<br>062-33a | 12_ATCC<br>15168 | 13_R  | 14_AS1.2<br>99 | 15_B1 | 16_B253 | 17_T6-13 | 18_SCgG<br>1 | 19_SCgG<br>2 | 20_Z188 | 21_S9114 | 22_AS1.5<br>42 | 23_MT | 24_SYPA<br>5-5 | 25_ATCC<br>21831 | 26_AR1 | YS314 | NCTC131<br>29 |
|------------------|--------------------------------|--------------------------------|--------------------------|--------------|------------------|------------------|------------------|------------------|------------------|----------------|--------------------|------------------|-------|----------------|-------|---------|----------|--------------|--------------|---------|----------|----------------|-------|----------------|------------------|--------|-------|---------------|
| 01_NC_003450_ATC | ---                            | 99.92                          | 99.92                    | 99.95        | 99.95            | 98.23            | 97.29            | 98.18            | 98.20            | 98.17          | 98.18              | 98.20            | 97.68 | 98.47          | 98.19 | 98.14   | 97.60    | 97.60        | 97.60        | 97.61   | 97.59    | 97.61          | 97.61 | 97.62          | 98.63            | 98.62  | 84.54 | 85.04         |
| 02_NC_006958_ATC | 99.92                          | ---                            | 99.92                    | 99.95        | 99.93            | 98.24            | 97.29            | 98.18            | 98.20            | 98.16          | 98.18              | 98.19            | 97.68 | 98.46          | 98.20 | 98.14   | 97.60    | 97.60        | 97.60        | 97.61   | 97.60    | 97.61          | 97.61 | 97.62          | 98.63            | 98.62  | 84.54 | 85.04         |
| 03_NC_020519_K51 | 99.92                          | 99.92                          | ---                      | 99.94        | 99.94            | 98.22            | 97.28            | 98.17            | 98.19            | 98.16          | 98.17              | 98.19            | 97.67 | 98.46          | 98.19 | 98.13   | 97.59    | 97.59        | 97.59        | 97.60   | 97.58    | 97.60          | 97.61 | 97.62          | 98.62            | 98.61  | 84.54 | 85.03         |
| 04_MB001         | 99.95                          | 99.95                          | 99.94                    | ---          | 99.96            | 98.25            | 97.28            | 98.18            | 98.20            | 98.17          | 98.18              | 98.20            | 97.67 | 98.48          | 98.20 | 98.14   | 97.60    | 97.60        | 97.60        | 97.61   | 97.59    | 97.61          | 97.61 | 97.62          | 98.64            | 98.63  | 84.55 | 85.04         |
| 05_ATCC21300     | 99.97                          | 99.96                          | 99.96                    | 99.97        | ---              | 98.27            | 97.30            | 98.25            | 98.22            | 98.21          | 98.21              | 98.25            | 97.71 | 98.47          | 98.20 | 98.19   | 97.62    | 97.62        | 97.62        | 97.62   | 97.61    | 97.62          | 97.62 | 97.61          | 98.64            | 98.63  | 84.50 | 85.24         |
| 06_ATCC13869     | 98.28                          | 98.28                          | 98.27                    | 98.29        | 98.30            | ---              | 97.30            | 98.54            | 98.52            | 98.52          | 98.52              | 98.56            | 97.68 | 98.32          | 98.53 | 98.48   | 97.63    | 97.66        | 97.66        | 97.66   | 97.66    | 97.65          | 97.64 | 97.68          | 98.36            | 98.34  | 84.77 | 84.97         |
| 07_ATCC13870     | 97.30                          | 97.31                          | 97.29                    | 97.30        | 97.30            | 97.28            | ---              | 97.36            | 97.35            | 97.34          | 97.35              | 97.38            | 97.80 | 97.35          | 97.48 | 97.43   | 97.75    | 97.75        | 97.75        | 97.75   | 97.73    | 97.73          | 97.74 | 97.27          | 97.25            | 97.25  | 84.78 | 85.02         |
| 08_ATCC14067     | 98.19                          | 98.19                          | 98.18                    | 98.19        | 98.24            | 98.49            | 97.35            | ---              | 99.89            | 99.88          | 99.89              | 99.92            | 97.72 | 98.28          | 98.78 | 98.71   | 97.70    | 97.72        | 97.73        | 97.72   | 97.70    | 97.73          | 97.70 | 97.76          | 98.25            | 98.23  | 84.61 | 84.91         |
| 09_ATCC21493     | 98.23                          | 98.23                          | 98.22                    | 98.23        | 98.24            | 98.51            | 97.36            | 99.92            | ---              | 99.89          | 99.90              | 99.94            | 97.73 | 98.29          | 98.77 | 98.73   | 97.71    | 97.73        | 97.73        | 97.73   | 97.71    | 97.72          | 97.71 | 97.75          | 98.28            | 98.26  | 84.68 | 85.00         |
| 10_SYPS062       | 98.19                          | 98.19                          | 98.18                    | 98.19        | 98.21            | 98.50            | 97.32            | 99.88            | 99.86            | ---            | 99.95              | 99.91            | 97.70 | 98.26          | 98.75 | 98.68   | 97.68    | 97.69        | 97.69        | 97.70   | 97.69    | 97.69          | 97.67 | 97.73          | 98.25            | 98.23  | 84.63 | 84.20         |
| 11_SYPS062-33a   | 98.20                          | 98.20                          | 98.19                    | 98.20        | 98.21            | 98.50            | 97.33            | 99.88            | 99.85            | 99.94          | ---                | 99.91            | 97.71 | 98.27          | 98.75 | 98.70   | 97.71    | 97.70        | 97.72        | 97.70   | 97.71    | 97.69          | 97.74 | 98.27          | 98.25            | 98.25  | 84.54 | 84.17         |
| 12_ATCC15168     | 98.20                          | 98.19                          | 98.19                    | 98.20        | 98.24            | 98.50            | 97.36            | 99.91            | 99.91            | 99.90          | 99.91              | ---              | 97.72 | 98.29          | 98.79 | 98.72   | 97.71    | 97.73        | 97.73        | 97.73   | 97.71    | 97.73          | 97.71 | 97.77          | 98.25            | 98.24  | 84.58 | 84.99         |
| 13_R             | 97.69                          | 97.69                          | 97.68                    | 97.68        | 97.71            | 97.65            | 97.79            | 97.70            | 97.70            | 97.68          | 97.69              | 97.72            | ---   | 97.77          | 97.86 | 97.79   | 98.80    | 98.83        | 98.83        | 98.82   | 98.80    | 98.82          | 98.81 | 98.83          | 97.65            | 97.63  | 84.85 | 84.65         |
| 14_AS1.299       | 98.48                          | 98.48                          | 98.47                    | 98.49        | 98.49            | 98.28            | 97.34            | 98.29            | 98.28            | 98.27          | 98.28              | 98.31            | 97.77 | ---            | 98.31 | 98.29   | 97.66    | 97.65        | 97.65        | 97.65   | 97.64    | 97.64          | 97.64 | 97.66          | 98.51            | 98.50  | 84.56 | 84.30         |
| 15_B1            | 98.21                          | 98.22                          | 98.20                    | 98.22        | 98.21            | 98.50            | 97.47            | 98.79            | 98.76            | 98.76          | 98.76              | 98.80            | 97.86 | 98.32          | ---   | 99.97   | 97.79    | 97.79        | 97.80        | 97.79   | 97.78    | 97.79          | 97.77 | 97.78          | 98.26            | 98.24  | 84.90 | 85.89         |
| 16_B253          | 98.14                          | 98.14                          | 98.13                    | 98.14        | 98.18            | 98.44            | 97.43            | 98.71            | 98.70            | 98.67          | 98.68              | 98.72            | 97.79 | 98.28          | 99.96 | ---     | 97.70    | 97.73        | 97.73        | 97.73   | 97.72    | 97.72          | 97.70 | 97.77          | 98.19            | 98.17  | 84.91 | 85.28         |
| 17_T6-13         | 97.61                          | 97.61                          | 97.60                    | 97.61        | 97.62            | 97.60            | 97.75            | 97.71            | 97.71            | 97.68          | 97.69              | 97.73            | 98.81 | 97.66          | 97.79 | 97.72   | ---      | 99.98        | 99.98        | 99.98   | 99.96    | 99.97          | 99.95 | 99.97          | 97.61            | 97.60  | 84.88 | 84.81         |
| 18_SCgG1         | 97.60                          | 97.60                          | 97.59                    | 97.60        | 97.62            | 97.62            | 97.74            | 97.72            | 97.72            | 97.68          | 97.69              | 97.73            | 98.83 | 97.64          | 97.79 | 97.73   | 99.95    | ---          | 99.97        | 99.98   | 99.96    | 99.96          | 99.94 | 99.97          | 97.61            | 97.59  | 84.88 | 84.79         |
| 19_SCgG2         | 97.60                          | 97.60                          | 97.59                    | 97.60        | 97.62            | 97.61            | 97.74            | 97.72            | 97.72            | 97.68          | 97.69              | 97.73            | 98.83 | 97.64          | 97.79 | 97.73   | 99.95    | 99.97        | ---          | 99.98   | 99.95    | 99.96          | 99.94 | 99.97          | 97.61            | 97.59  | 84.88 | 84.79         |
| 20_Z188          | 97.62                          | 97.62                          | 97.61                    | 97.62        | 97.62            | 97.64            | 97.75            | 97.72            | 97.72            | 97.69          | 97.70              | 97.73            | 98.83 | 97.65          | 97.78 | 97.74   | 99.96    | 99.98        | 99.98        | ---     | 99.96    | 99.97          | 99.95 | 99.97          | 97.62            | 97.61  | 84.79 | 84.77         |
| 21_S9114         | 97.60                          | 97.61                          | 97.59                    | 97.60        | 97.61            | 97.62            | 97.73            | 97.69            | 97.70            | 97.67          | 97.68              | 97.71            | 98.81 | 97.65          | 97.77 | 97.73   | 99.94    | 99.96        | 99.96        | 99.96   | ---      | 99.96          | 99.93 | 99.96          | 97.61            | 97.60  | 84.80 | 84.00         |
| 22_AS1.542       | 97.62                          | 97.62                          | 97.61                    | 97.62        | 97.62            | 97.61            | 97.73            | 97.72            | 97.72            | 97.70          | 97.71              | 97.74            | 98.83 | 97.65          | 97.79 | 97.74   | 99.96    | 99.97        | 99.97        | 99.98   | 99.96    | ---            | 99.95 | 99.97          | 97.61            | 97.60  | 84.87 | 84.76         |
| 23_MT            | 97.62                          | 97.62                          | 97.61                    | 97.61        | 97.62            | 97.61            | 97.73            | 97.71            | 97.70            | 97.67          | 97.68              | 97.73            | 98.82 | 97.65          | 97.77 | 97.71   | 99.93    | 99.95        | 99.95        | 99.95   | 99.94    | 99.95          | ---   | 99.99          | 97.61            | 97.59  | 84.85 | 84.73         |
| 24_SYPA5-5       | 97.62                          | 97.63                          | 97.61                    | 97.63        | 97.61            | 97.67            | 97.75            | 97.75            | 97.75            | 97.73          | 97.73              | 97.76            | 98.83 | 97.66          | 97.78 | 97.77   | 99.97    | 99.97        | 99.97        | 99.97   | 99.96    | 99.97          | 99.99 | ---            | 97.64            | 97.62  | 84.82 | 84.63         |
| 25_ATCC21831     | 98.63                          | 98.63                          | 98.62                    | 98.64        | 98.64            | 98.31            | 97.24            | 98.23            | 98.25            | 98.24          | 98.26              | 98.25            | 97.65 | 98.50          | 98.25 | 98.19   | 97.60    | 97.61        | 97.61        | 97.61   | 97.60    | 97.60          | 97.59 | 97.63          | ---              | 99.95  | 84.63 | 84.26         |
| 26_AR1           | 98.62                          | 98.62                          | 98.61                    | 98.63        | 98.63            | 98.30            | 97.24            | 98.23            | 98.24            | 98.23          | 98.24              | 98.24            | 97.63 | 98.49          | 98.23 | 98.17   | 97.59    | 97.59        | 97.59        | 97.60   | 97.59    | 97.59          | 97.58 | 97.62          | 99.94            | ---    | 84.51 | 84.17         |
| YS314            | 84.55                          | 84.55                          | 84.54                    | 84.55        | 84.51            | 84.76            | 84.73            | 84.63            | 84.64            | 84.63          | 84.54              | 84.59            | 84.85 | 84.53          | 84.92 | 84.92   | 84.88    | 84.89        | 84.88        | 84.80   | 84.81    | 84.88          | 84.85 | 84.82          | 84.63            | 84.52  | ---   | 83.99         |
| NCTC13129        | 85.00                          | 85.01                          | 85.00                    | 85.00        | 85.21            | 85.01            | 85.01            | 84.90            | 85.03            | 84.18          | 84.19              | 84.95            | 84.65 | 84.25          | 85.86 | 85.23   | 84.77    | 84.75        | 84.75        | 84.75   | 84.01    | 84.74          | 84.70 | 84.61          | 84.21            | 84.15  | 83.97 | ---           |

TableS3 DDH

| 01_NC_0034             | 02_NC_0069 | 03_NC_0205 | 04_MB001 | 05_ATCC21 | 06_ATCC138 | 07_ATCC13 | 08_ATCC140 | 09_ATCC21 | 10_SYPS062 | 11_SYPS062 | 12_ATCC151 | 13_R | 14_AS1299 | 15_B1 | 16_B253 | 17_16-13 | 18_ScG1 | 19_ScG2 | 20_Z188 | 21_S9114 | 22_AS1542 | 23_MT | 24_SYP5A5 | 25_ATCC21 | 26_AR1 | YS314 | NCTC13129 |      |      |
|------------------------|------------|------------|----------|-----------|------------|-----------|------------|-----------|------------|------------|------------|------|-----------|-------|---------|----------|---------|---------|---------|----------|-----------|-------|-----------|-----------|--------|-------|-----------|------|------|
| 50_ATCC13              | 58_ATCC130 | 19_K51     |          | 300       | 69         | 870       | 67         | 493       | -33a       | 68         |            |      |           |       |         |          |         |         |         |          |           |       |           |           |        |       |           |      |      |
| 032                    | 32         |            |          |           |            |           |            |           |            |            |            |      |           |       |         |          |         |         |         |          |           |       |           |           |        |       |           |      |      |
| 01_NC_003450_ATCC13032 | 100        | 99.7       | 100      | 100       | 94.7       | 84.7      | 75.1       | 84        | 83.9       | 83.7       | 83.7       | 84.1 | 78.7      | 86.4  | 83.3    | 83.1     | 77.3    | 77.2    | 77.2    | 77       | 77.2      | 77    | 77.2      | 77        | 77.2   | 87.9  | 87.8      | 20.5 | 23.8 |
| 02_NC_006958_ATCC13032 | 99.7       | 100        | 99.7     | 99.9      | 99.9       | 84.6      | 75.1       | 84        | 83.8       | 83.6       | 83.7       | 84   | 78.7      | 86.3  | 83.2    | 83.1     | 77.3    | 77.1    | 77.1    | 77.1     | 77        | 77.1  | 76.9      | 77.1      | 87.9   | 87.8  | 20.5      | 23.8 |      |
| 03_NC_020519_K51       | 100        | 99.7       | 100      | 99.9      | 94.7       | 84.6      | 75.1       | 83.9      | 83.8       | 83.6       | 83.7       | 84   | 78.7      | 86.3  | 83.2    | 83.1     | 77.3    | 77.1    | 77.1    | 77.1     | 77        | 77.2  | 76.9      | 77.1      | 87.9   | 87.7  | 20.6      | 23.8 |      |
| 04_MB001               | 100        | 99.9       | 99.9     | 100       | 99.9       | 84.8      | 75.1       | 84        | 83.9       | 83.7       | 83.7       | 84.1 | 78.7      | 86.5  | 83.3    | 83.1     | 77.2    | 77.2    | 77.2    | 77.2     | 77.1      | 77.3  | 77        | 77.2      | 88.1   | 87.9  | 20.5      | 23.8 |      |
| 05_ATCC21300           | 94.7       | 99.9       | 94.7     | 99.9      | 100        | 84.7      | 75.2       | 84.1      | 83.9       | 83.8       | 84.1       | 78.8 | 86.3      | 83.2  | 83.1    | 77.4     | 77.2    | 77.2    | 77.2    | 77.2     | 77.3      | 77    | 77.2      | 87.9      | 87.8   | 20.2  | 22.7      |      |      |
| 06_ATCC13869           | 84.7       | 84.6       | 84.6     | 84.8      | 84.7       | 100       | 75.2       | 87.3      | 87.2       | 87.1       | 87.1       | 87.4 | 78.8      | 85    | 86.3    | 86.2     | 78.4    | 78.4    | 78.4    | 78.4     | 78.4      | 78.4  | 78.3      | 78.5      | 85.1   | 85.3  | 21.1      | 23.3 |      |
| 07_ATCC13870           | 75.1       | 75.1       | 75.1     | 75.1      | 75.2       | 75.2      | 100        | 75.8      | 75.7       | 75.6       | 75.6       | 75.8 | 79.9      | 75.7  | 76.4    | 76.1     | 79.9    | 79.6    | 79.6    | 79.7     | 79.7      | 79.4  | 79.6      | 74.6      | 74.5   | 20.9  | 23        |      |      |
| 08_ATCC14067           | 84         | 84         | 83.9     | 84        | 84.1       | 87.3      | 75.8       | 100       | 97.5       | 97.5       | 98.7       | 98.4 | 79.3      | 84.6  | 88.7    | 88.6     | 79      | 79      | 79      | 78.9     | 78.8      | 79    | 78.8      | 79.3      | 84.4   | 84.3  | 20.6      | 23.9 |      |
| 09_ATCC21493           | 83.9       | 83.8       | 83.8     | 83.9      | 83.9       | 87.2      | 75.7       | 97.5      | 100        | 99.6       | 99.6       | 92.4 | 79.2      | 84.6  | 88.6    | 88.5     | 79      | 79      | 79      | 78.9     | 78.8      | 79    | 78.9      | 79.2      | 84.4   | 84.3  | 20.4      | 23.1 |      |
| 10_SYPS062             | 83.7       | 83.6       | 83.6     | 83.7      | 83.8       | 87.1      | 75.6       | 97.5      | 99.6       | 100        | 100        | 92.7 | 79.1      | 84.4  | 88.5    | 88.3     | 78.7    | 78.7    | 78.7    | 78.7     | 78.7      | 78.6  | 79        | 84.2      | 84     | 20.3  | 22.4      |      |      |
| 11_SYPS062-33a         | 83.7       | 83.7       | 83.7     | 83.7      | 83.8       | 87.1      | 75.6       | 98.7      | 99.6       | 100        | 100        | 94.5 | 79.1      | 84.4  | 88.5    | 88.3     | 78.7    | 78.7    | 78.7    | 78.8     | 78.7      | 78.6  | 79        | 84.2      | 84.1   | 20.3  | 22.5      |      |      |
| 12_ATCC15168           | 84.1       | 84         | 84       | 84.1      | 84.1       | 87.4      | 75.8       | 98.4      | 92.4       | 92.7       | 94.5       | 100  | 79.4      | 84.7  | 88.8    | 88.7     | 79.1    | 79.1    | 79.1    | 79       | 78.8      | 79.1  | 78.9      | 79.3      | 84.5   | 84.4  | 20.7      | 24.2 |      |
| 13_R                   | 78.7       | 78.7       | 78.7     | 78.7      | 78.8       | 78.8      | 79.9       | 79.3      | 79.2       | 79.1       | 79.1       | 79.4 | 100       | 79.6  | 80.2    | 80.1     | 89.8    | 89.8    | 89.8    | 89.7     | 89.6      | 89.8  | 89.5      | 89.7      | 78.6   | 78.5  | 21.1      | 23.7 |      |
| 14_AS1299              | 86.4       | 86.3       | 86.3     | 86.5      | 86.3       | 85        | 75.7       | 84.6      | 84.6       | 84.4       | 84.4       | 84.7 | 79.6      | 100   | 84.1    | 84       | 78.6    | 78.3    | 78.3    | 78.3     | 78.2      | 78.4  | 78.2      | 78.3      | 86.7   | 86.6  | 20.7      | 22.7 |      |
| 15_B1                  | 83.3       | 83.2       | 83.2     | 83.3      | 83.2       | 86.3      | 76.4       | 88.7      | 88.6       | 88.5       | 88.5       | 88.8 | 80.2      | 84.1  | 100     | 97.4     | 79.4    | 79.4    | 79.4    | 79.3     | 79.3      | 79.4  | 79.2      | 79.4      | 83.4   | 83.3  | 20.6      | 23.7 |      |
| 16_B253                | 83.1       | 83.1       | 83.1     | 83.1      | 83.1       | 86.2      | 76.1       | 88.6      | 88.5       | 88.3       | 88.3       | 88.7 | 80.1      | 84    | 97.4    | 100      | 79.1    | 79.1    | 79.1    | 79.1     | 79        | 79.1  | 78.9      | 79.3      | 83.1   | 83    | 21        | 24.2 |      |
| 17_16-13               | 77.3       | 77.3       | 77.3     | 77.2      | 77.4       | 78.4      | 79.9       | 79        | 79         | 78.7       | 78.7       | 79.1 | 89.8      | 78.6  | 78.4    | 79.1     | 100     | 94.2    | 94.2    | 100      | 99.9      | 100   | 95.8      | 99.9      | 77.5   | 77.4  | 20.8      | 23.2 |      |
| 18_ScG1                | 77.2       | 77.1       | 77.1     | 77.2      | 77.2       | 78.4      | 79.6       | 79        | 79         | 78.7       | 78.7       | 79.1 | 89.8      | 78.3  | 79.4    | 79.1     | 94.2    | 100     | 99.5    | 99.2     | 94.2      | 99.8  | 99.2      | 77.6      | 77.4   | 21.2  | 24.1      |      |      |
| 19_ScG2                | 77.2       | 77.1       | 77.1     | 77.2      | 77.2       | 78.4      | 79.6       | 79        | 79         | 78.7       | 78.7       | 79.1 | 89.8      | 78.3  | 79.4    | 79.1     | 94.2    | 100     | 99.5    | 99.2     | 94.2      | 99.8  | 99.2      | 77.6      | 77.4   | 21.2  | 24.1      |      |      |
| 20_Z188                | 77.2       | 77.1       | 77.1     | 77.2      | 77.2       | 78.4      | 79.7       | 78.9      | 78.9       | 78.7       | 78.8       | 79   | 89.7      | 78.3  | 79.3    | 79.1     | 100     | 99.5    | 99.5    | 100      | 99.9      | 100   | 95.2      | 99.9      | 77.5   | 77.4  | 20.4      | 21.9 |      |
| 21_S9114               | 77         | 77         | 77       | 77.1      | 77.2       | 78.4      | 79.7       | 78.8      | 78.8       | 78.7       | 78.7       | 78.8 | 89.6      | 78.2  | 79.3    | 79       | 99.9    | 99.2    | 99.2    | 99.9     | 100       | 99.9  | 95.4      | 99.8      | 77.4   | 77.3  | 20.5      | 21.2 |      |
| 22_AS1542              | 77.2       | 77.1       | 77.2     | 77.3      | 77.3       | 78.4      | 79.7       | 79        | 79         | 78.7       | 78.7       | 79.1 | 89.8      | 78.4  | 79.4    | 79.1     | 100     | 94.2    | 94.2    | 100      | 99.9      | 100   | 95.8      | 99.9      | 77.6   | 77.4  | 20.8      | 23.2 |      |
| 23_MT                  | 77         | 76.9       | 76.9     | 77        | 77         | 78.3      | 79.4       | 78.8      | 78.8       | 78.6       | 78.9       | 89.5 | 78.2      | 79.2  | 78.9    | 95.8     | 99.8    | 99.8    | 95.2    | 95.4     | 95.8      | 100   | 95.5      | 77.4      | 77.3   | 20.8  | 23.4      |      |      |
| 24_SYP5A5              | 77.2       | 77.1       | 77.1     | 77.2      | 77.2       | 78.5      | 79.6       | 79.3      | 79.2       | 79         | 79         | 79.3 | 89.7      | 78.3  | 79.4    | 79.3     | 99.9    | 99.2    | 99.2    | 99.9     | 99.8      | 95.5  | 100       | 77.7      | 77.5   | 20.9  | 22.4      |      |      |
| 25_ATCC21831           | 87.9       | 87.9       | 87.9     | 88.1      | 87.9       | 85.1      | 74.6       | 84.4      | 84.4       | 84.2       | 84.5       | 78.6 | 86.7      | 83.4  | 83.1    | 77.5     | 77.6    | 77.6    | 77.5    | 77.4     | 77.6      | 77.4  | 77.7      | 100       | 99.1   | 21    | 23.2      |      |      |
| 26_AR1                 | 87.8       | 87.8       | 87.7     | 87.8      | 87.8       | 85.3      | 74.5       | 84.3      | 84.3       | 84         | 84.1       | 84.4 | 78.5      | 86.6  | 83.3    | 83       | 77.4    | 77.4    | 77.4    | 77.4     | 77.3      | 77.4  | 77.3      | 77.5      | 99.1   | 100   | 20.9      | 23.2 |      |
| YS314                  | 20.5       | 20.5       | 20.6     | 20.5      | 20.2       | 21.1      | 20.9       | 20.6      | 20.4       | 20.3       | 20.3       | 20.7 | 21.1      | 20.7  | 20.6    | 21       | 20.8    | 21.2    | 21.2    | 20.4     | 20.5      | 20.8  | 20.8      | 20.9      | 21     | 20.9  | 100       | 24.2 |      |
| NCTC13129              | 23.8       | 23.8       | 23.8     | 23.8      | 22.7       | 23.3      | 23         | 23.9      | 23.1       | 22.4       | 22.5       | 24.2 | 23.7      | 22.7  | 23.7    | 24.2     | 23.2    | 24.1    | 24.1    | 24.1     | 21.9      | 21.2  | 23.2      | 23.4      | 22.4   | 23.2  | 23.2      | 24.2 | 100  |
