# Supplementary material for: Comparative analysis of Corynebacterium glutamicum genomes: a new perspective for the industrial production of amino acids
Source: PubMed Central journal article supplement (PMC5310272; doi:10.1186/s12864-016-3255-4), 2017-01-25
Supplement: 12864_2016_3255_MOESM4_ESM.pdf [file 12864_2016_3255_MOESM4_ESM.pdf]

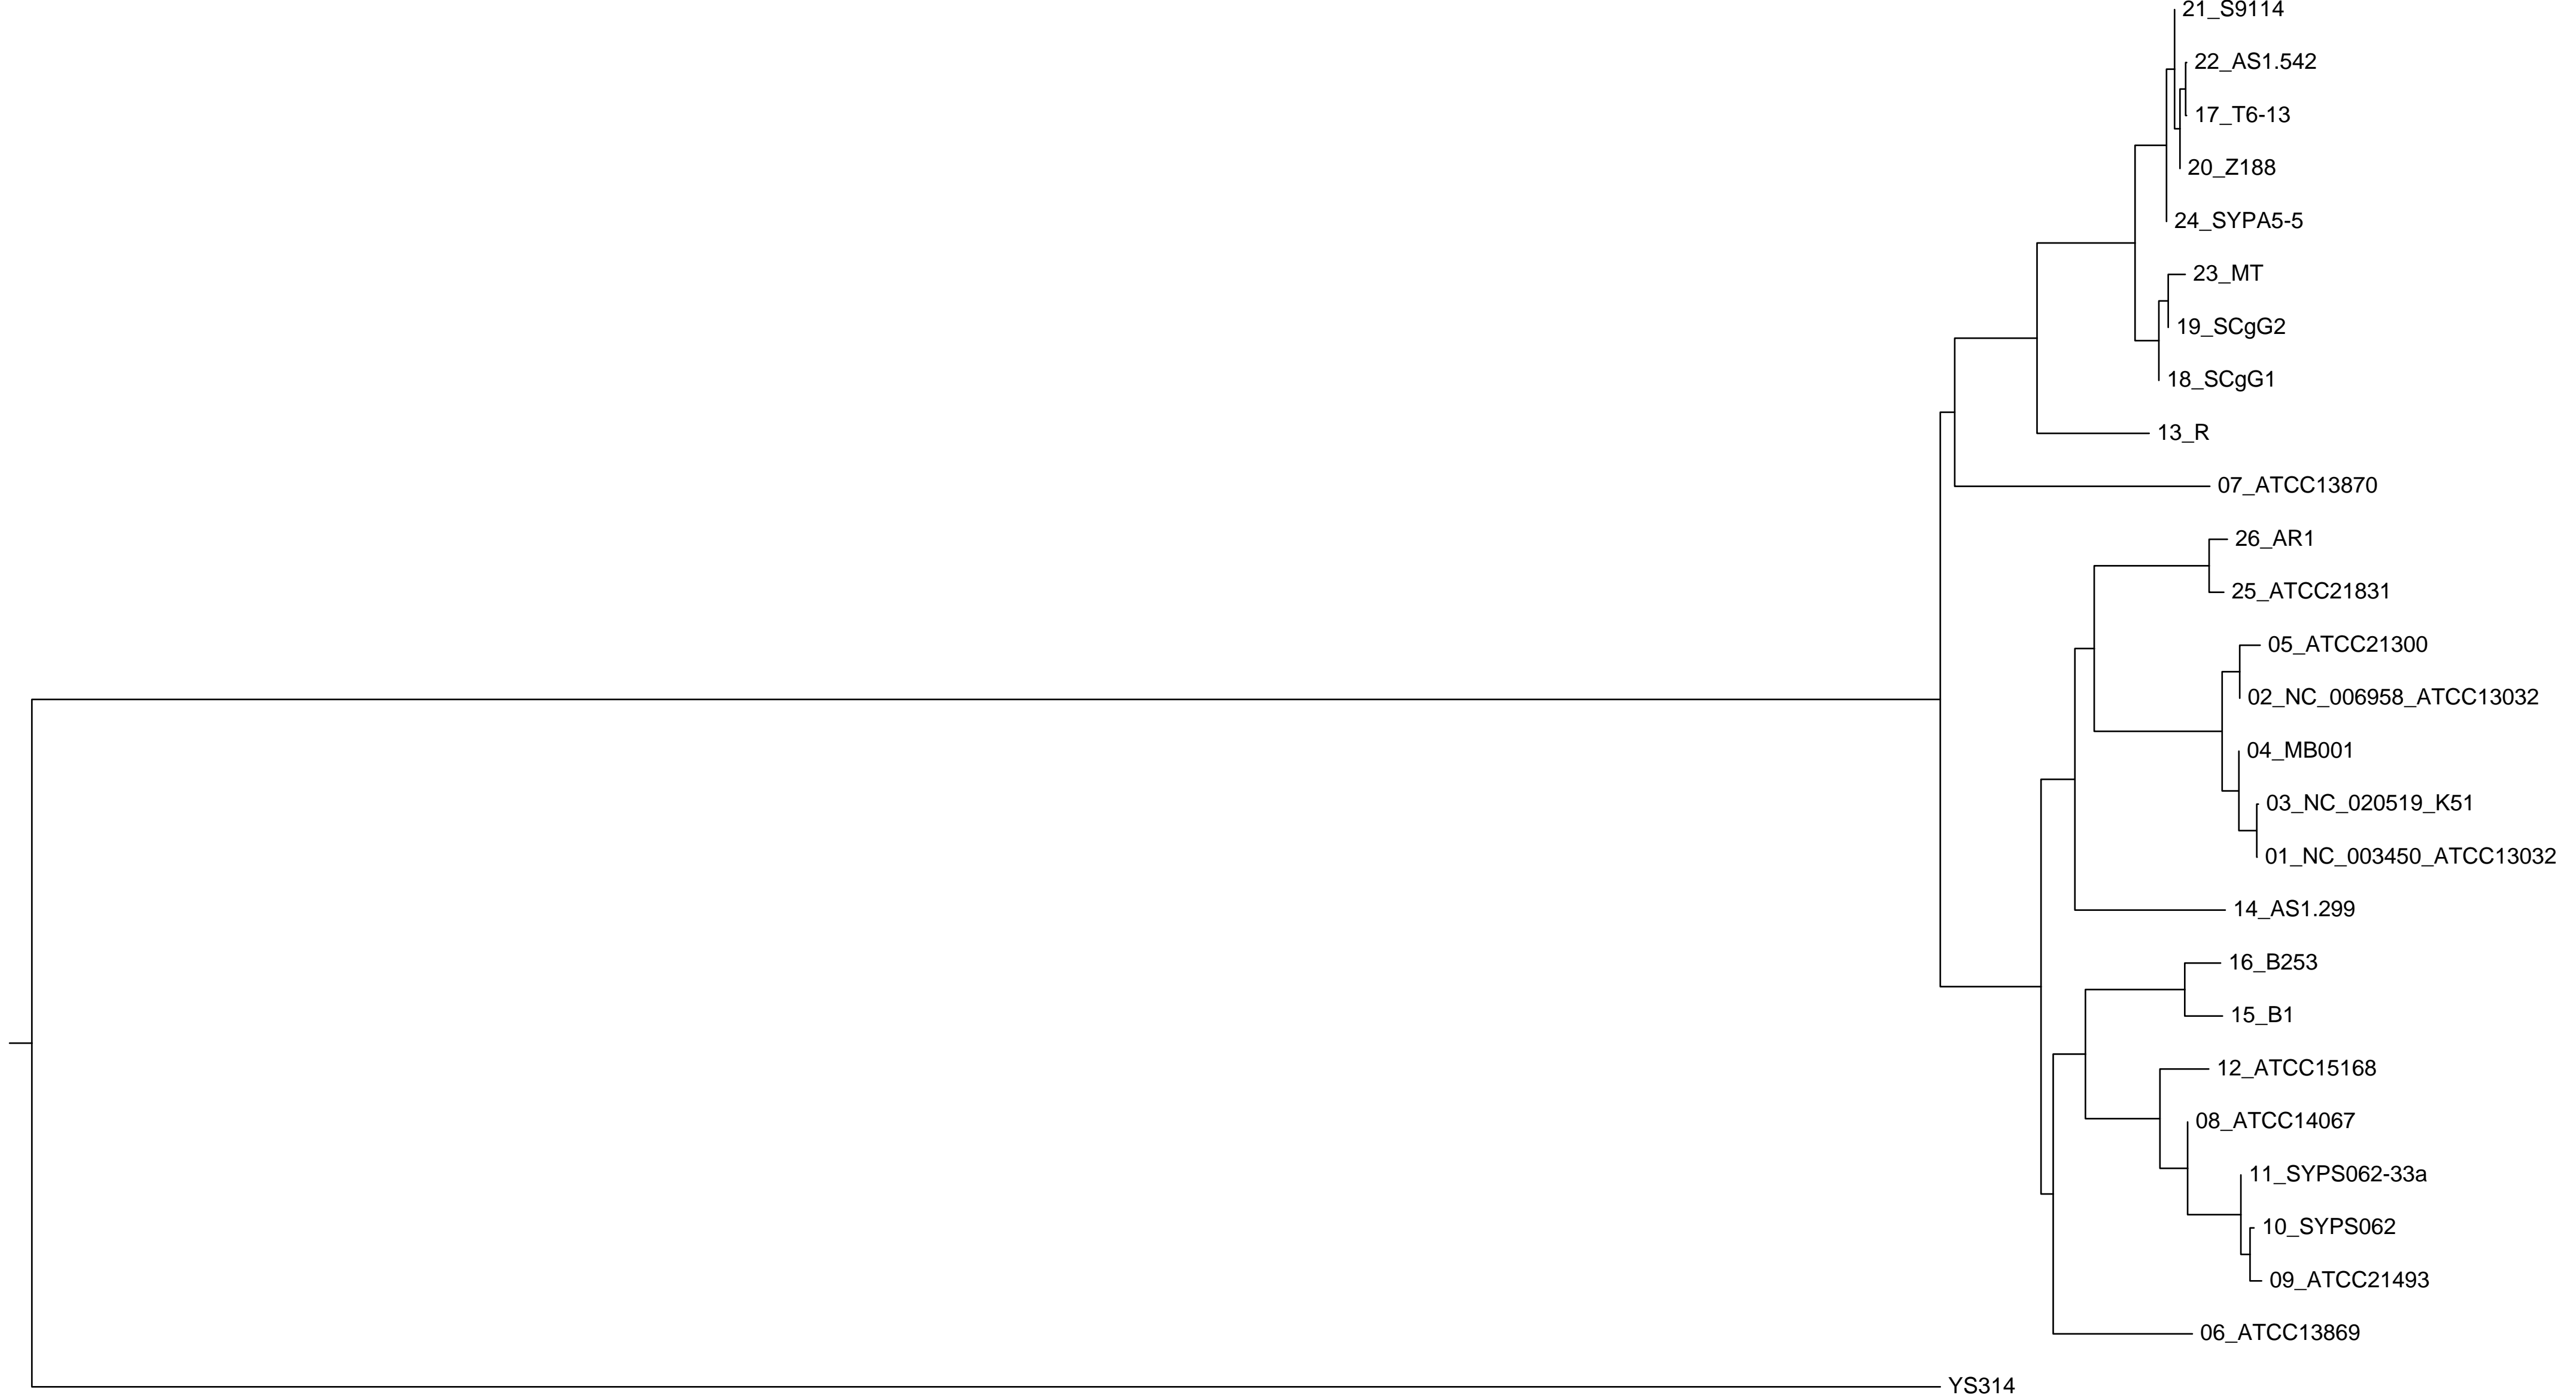

0.02
